# Supplementary material
Source: PubMed Central journal article supplement (PMC3512239)

**Supplementary Table 1.** Number of controls and cases of NHL and NHL subtypes used in this study from the International Lymphoma Epidemiology Consortium.

|                   | <b>EpiLymph</b> | <b>BC</b> | <b>Mayo</b> | <b>UCSF1</b> | <b>UCSF2</b> | <b>NSW</b> | <b>NCI-SEER</b> | <b>Yale</b> | <b>TOTAL</b> |
|-------------------|-----------------|-----------|-------------|--------------|--------------|------------|-----------------|-------------|--------------|
| <b>B-cell NHL</b> | 1024            | 489       | 940         | 303          | 1208         | 493        | 835             | 341         | <b>5633</b>  |
| <b>DLBCL</b>      | 361             | 149       | 178         | 101          | 451          | 173        | 317             | 151         | 1881         |
| <b>FL</b>         | 187             | 167       | 244         | 114          | 291          | 205        | 256             | 115         | 1579         |
| <b>SLL/CLL</b>    | 311             | 35        | 342         | 0            | 300          | 18         | 102             | 42          | 1150         |
| <b>MCL</b>        | 48              | 40        | 54          | 0            | 35           | 21         | 35              | 0           | 233          |
| <b>MZL</b>        | 106             | 59        | 60          | 0            | 89           | 50         | 72              | 33          | 469          |
| <b>OTHER BNHL</b> | 11              | 39        | 62          | 88           | 42           | 26         | 53              | 0           | 321          |
| <b>Controls</b>   | 1402            | 549       | 1226        | 774          | 1293         | 498        | 748             | 544         | <b>7034</b>  |

BC, British Columbia Study; Mayo, Mayo Clinic Study; UCSF1 and UCSF2, University of California, San Francisco, Studies 1 and 2; NSW, New South Wales Study; NCI-SEER, National Cancer Institute/Surveillance, Epidemiology, and End Results Study; Yale, Yale University Study.

**Supplementary Table 2.** List of selected single nucleotide polymorphisms genotyped in the studies of the International Lymphoma Epidemiology Consortium.

| SNP        | Gene(s)                  | Loc (GRCh37) | EpiLymph | BC | Mayo | UCSF1 | UCSF2 | NSW | NCI-SEER | Yale | # cases/<br>#controls |
|------------|--------------------------|--------------|----------|----|------|-------|-------|-----|----------|------|-----------------------|
| rs361525   | TNF, LTA                 | 6-31543101   | 1        | 1  | 1    | 0     | 0     | 1   | 1        | 1    | 3954/4791             |
| rs731236   | VDR                      | 12-48238757  | 1        | 0  | 1    | 1     | 0     | 1   | 1        | 1    | 3518/4718             |
| rs2305160  | AC016738.3, NPAS2        | 2-101591304  | 1        | 1  | 1    | 0     | 1     | 0   | 0        | 0    | 3203/3878             |
| rs737865   | COMT, TXNRD2             | 22-19930121  | 1        | 1  | 1    | 1     | 1     | 0   | 0        | 0    | 3749/5036             |
| rs1799929  | NAT2                     | 8-18257994   | 1        | 1  | 1    | 1     | 1     | 0   | 1        | 1    | 4827/6208             |
| rs2582869  | TNFSF13B                 | 13-108912145 | 1        | 1  | 1    | 0     | 1     | 1   | 1        | 1    | 4649/5447             |
| rs2308321  | RP11-109A6.3, MGMT       | 10-131565064 | 1        | 1  | 1    | 0     | 1     | 1   | 1        | 1    | 4674/5461             |
| rs187084   | TWF2, TLR9, RP11-330H6.5 | 3-52261031   | 1        | 1  | 1    | 0     | 0     | 0   | 1        | 0    | 2990/3647             |
| rs699517   | ENOSF1, TYMS             | 18-673016    | 1        | 1  | 1    | 1     | 0     | 1   | 1        | 1    | 4322/5560             |
| rs4774584  | CYP19A1                  | 15-51562007  | 1        | 1  | 1    | 0     | 1     | 0   | 0        | 0    | 3458/4348             |
| rs1870049  | CYP19A1                  | 15-51625223  | 1        | 1  | 1    | 1     | 1     | 0   | 0        | 0    | 3752/5034             |
| rs3824848  | LMO2                     | 11-33886547  | 1        | 1  | 1    | 0     | 0     | 1   | 1        | 1    | 3908/4750             |
| rs4986782  | NAT1                     | 8-18080116   | 0        | 1  | 1    | 0     | 0     | 1   | 1        | 1    | 2979/3430             |
| rs2227973  | RAG2, RAG1               | 11-36597313  | 1        | 1  | 1    | 1     | 1     | 1   | 1        | 1    | 5060/6238             |
| rs1137101  | LEPR                     | 1-66058513   | 1        | 1  | 1    | 1     | 1     | 0   | 0        | 0    | 3941/5135             |
| rs16994592 | CD70                     | 19-6586498   | 1        | 1  | 1    | 0     | 0     | 1   | 1        | 1    | 3907/4752             |
| rs4334089  | RP11-89H19.1, VDR        | 12-48286015  | 1        | 0  | 1    | 1     | 1     | 0   | 0        | 0    | 3002/4011             |
| rs3132453  | BAG6, PRRC2A             | 6-31604044   | 1        | 1  | 1    | 1     | 1     | 1   | 1        | 1    | 4658/5919             |
| rs13178127 | XRCC4                    | 5-82589432   | 1        | 1  | 1    | 0     | 0     | 1   | 1        | 1    | 3910/4754             |
| rs1776948  | SLC23A2                  | 20-4931113   | 1        | 1  | 1    | 0     | 1     | 0   | 0        | 0    | 3448/4339             |
| rs3769821  | CASP8                    | 2-202123430  | 1        | 1  | 1    | 0     | 0     | 1   | 1        | 1    | 3900/4753             |
| rs2239704  | TNF, LTA                 | 6-31540141   | 1        | 1  | HWE  | 0     | 0     | 1   | 1        | 1    | 2955/3498             |
| rs2243263  | IL4                      | 5-132013299  | 1        | 1  | 1    | 0     | 0     | 1   | 1        | 1    | 3893/4746             |
| rs4880     | SOD2                     | 6-160113872  | 0        | 1  | 1    | 1     | 0     | 0   | 1        | 1    | 2729/3592             |
| rs909253   | TNF, LTA                 | 6-31540313   | 1        | 1  | 1    | 0     | 1     | 1   | 1        | 1    | 5046/6067             |
| rs1805388  | LIG4                     | 13-108863591 | 0        | 1  | 0    | 0     | 0     | 1   | 1        | 1    | 1997/2190             |
| rs1799930  | NAT2                     | 8-18258103   | 1        | 1  | 1    | 1     | 0     | 1   | 1        | 1    | 4302/5524             |
| rs3172469  | BCL6, RP11-211G3.2       | 3-187459088  | 1        | 1  | 1    | 0     | 1     | 1   | 1        | 1    | 4580/5373             |
| rs12211228 | IRF4                     | 6-408833     | 1        | 1  | 1    | 0     | 0     | 1   | 1        | 1    | 3904/4750             |
| rs4516035  | RP11-89H19.1, VDR        | 12-48299826  | 1        | 0  | 1    | 1     | 1     | 0   | 0        | 0    | 3453/4588             |
| rs485497   | CTD-2049J23.2            | 3-159719132  | 1        | 1  | 1    | 0     | 1     | 1   | 1        | 1    | 4657/5451             |
| rs10008492 | -                        | 4-38765720   | 0        | 1  | 1    | 0     | 1     | 1   | 1        | 1    | 3627/4045             |
| rs1801274  | FCGR2A                   | 1-161479745  | 1        | 1  | 1    | 0     | 1     | 1   | 1        | 1    | 5225/6159             |

|           |                                      |              |     |   |   |   |   |   |     |   |           |
|-----------|--------------------------------------|--------------|-----|---|---|---|---|---|-----|---|-----------|
| rs1785882 | CASP1, CARD16                        | 11-104923075 | 1   | 1 | 1 | 0 | 0 | 1 | 1   | 1 | 3877/4743 |
| rs1800872 | IL10                                 | 1-206946407  | 1   | 1 | 1 | 0 | 1 | 1 | 1   | 1 | 4940/5962 |
| rs1800871 | IL10                                 | 1-206946634  | 1   | 1 | 1 | 0 | 0 | 1 | 1   | 1 | 4043/4891 |
| rs6736233 | CASP8                                | 2-202118974  | 1   | 1 | 1 | 0 | 0 | 1 | 1   | 1 | 3909/4755 |
| rs3020314 | ESR1                                 | 6-152270672  | 1   | 1 | 1 | 1 | 1 | 0 | 0   | 0 | 3941/5143 |
| rs4833103 | TLR1                                 | 4-38815502   | 1   | 1 | 1 | 0 | 1 | 1 | 1   | 1 | 4599/5351 |
| rs1341239 | -                                    | 6-22304204   | 1   | 1 | 1 | 1 | 1 | 0 | 0   | 0 | 3939/5141 |
| rs2844482 | TNF, LTA                             | 6-31539767   | 1   | 1 | 1 | 0 | 1 | 1 | 1   | 1 | 5098/6024 |
| rs1805087 | MTR                                  | 1-237048500  | 0   | 1 | 1 | 1 | 1 | 1 | 1   | 1 | 4495/5426 |
| rs1799931 | NAT2                                 | 8-18258370   | 1   | 1 | 1 | 1 | 1 | 1 | 1   | 1 | 5318/6705 |
| rs743572  | CYP17A1, RP11-753C18.4, CYP17A1OS    | 10-104597152 | 1   | 1 | 1 | 1 | 0 | 0 | 0   | 0 | 2665/3780 |
| rs696217  | GHRL, SEC13, GHRLOS, TATDN2, GHRLOS2 | 3-10331457   | 1   | 1 | 1 | 0 | 1 | 0 | 0   | 0 | 3660/4467 |
| rs3789068 | BCL2L11                              | 2-111909247  | 1   | 1 | 1 | 0 | 1 | 1 | 1   | 1 | 4641/5432 |
| rs2297518 | NOS2                                 | 17-26096597  | 1   | 1 | 1 | 0 | 1 | 1 | 1   | 1 | 4763/5526 |
| rs36686   | B3GNT3, INSL3                        | 19-17922795  | 1   | 0 | 1 | 0 | 1 | 0 | 1   | 0 | 3383/3957 |
| rs4680    | COMT                                 | 22-19951271  | 1   | 1 | 1 | 1 | 1 | 0 | 1   | 0 | 4391/5557 |
| rs1056932 | BCL6, RP11-211G3.3                   | 3-187447032  | 1   | 0 | 1 | 0 | 0 | 1 | 1   | 1 | 3528/4297 |
| rs4986790 | U6, TLR4                             | 9-120475302  | 1   | 1 | 1 | 1 | 1 | 0 | 1   | 1 | 4569/5719 |
| rs2849377 | BCL2                                 | 18-60971644  | 1   | 1 | 1 | 0 | 0 | 1 | 1   | 1 | 3907/4753 |
| rs3918241 | MMP9                                 | 20-44635735  | 1   | 1 | 1 | 0 | 1 | 0 | 0   | 0 | 3411/4268 |
| rs6596473 | SLC23A1                              | 5-138710576  | 1   | 1 | 1 | 0 | 1 | 0 | 0   | 0 | 3399/4252 |
| rs1801133 | MTHFR                                | 1-11856378   | 1   | 1 | 1 | 1 | 1 | 1 | 1   | 1 | 5451/6771 |
| rs1715364 | SLC23A2                              | 20-4898896   | 1   | 1 | 1 | 0 | 1 | 0 | 0   | 0 | 3507/4276 |
| rs1143627 | IL1B                                 | 2-113594387  | 1   | 1 | 1 | 1 | 0 | 1 | 1   | 1 | 4335/5581 |
| rs1799724 | TNF, LTA                             | 6-31542482   | 1   | 0 | 0 | 0 | 0 | 1 | 1   | 1 | 2601/3104 |
| rs1800630 | TNF, LTA                             | 6-31542476   | 0   | 1 | 1 | 0 | 0 | 1 | HWE | 1 | 2219/2756 |
| rs17576   | AL162458.1, RP11-465L10.10, MMP9     | 20-44640225  | 1   | 1 | 1 | 0 | 1 | 0 | 1   | 0 | 3876/4506 |
| rs2899472 | CYP19A1                              | 15-51516055  | 1   | 1 | 1 | 0 | 1 | 0 | 1   | 0 | 4330/5097 |
| rs1801280 | NAT2                                 | 8-18257854   | 1   | 1 | 1 | 1 | 0 | 1 | 1   | 1 | 4286/5513 |
| rs1800797 | IL6, AC073072.5                      | 7-22766221   | HWE | 1 | 1 | 0 | 0 | 1 | 1   | 1 | 3025/3489 |
| rs4934436 | -                                    | 10-90783320  | 1   | 1 | 1 | 0 | 1 | 1 | 1   | 1 | 4643/5432 |
| rs1921310 | TANK                                 | 2-162049201  | 1   | 1 | 1 | 0 | 0 | 1 | 1   | 1 | 3888/4719 |
| rs2243248 | IL4                                  | 5-132008644  | 1   | 1 | 1 | 0 | 0 | 1 | 1   | 1 | 4059/4913 |
| rs16147   | NPY                                  | 7-24323410   | 1   | 0 | 1 | 1 | 1 | 0 | 0   | 0 | 3256/4486 |

1 = SNP genotyped, 0 = SNP not genotyped, HWE = SNP not included in meta-analysis (Hardy-Weinberg p-value < 0.001)

BC, British Columbia Study; Mayo, Mayo Clinic Study; UCSF1 and UCSF2, University of California, San Francisco, Studies 1 and 2; NSW, New South Wales Study; NCI-SEER, National Cancer Institute/Surveillance, Epidemiology, and End Results Study; Yale, Yale University Study.

**Supplementary Table 3.** Meta-analysis results for candidate SNPs and risk of Non-Hodgkin Lymphoma. Table shows the association results for B-cell NHL and major B-cell NHL subtypes (DLBCL, FL, CLL) for all the SNPs that showed evidence of association to any B-cell NHL subtype at a random-effects meta-analysis p-value  $< 1.32 \times 10^{-3}$ .

| SNP (A1/A2)     | Gene(s)      | Loc (GRCh37) | SUBTYPE | STUDIES | Random-effects p-value | Random-effects OR (95%CI) | Fixed-effects p-value | Fixed-effects OR (95%CI) | I <sup>2</sup> heterogeneity index | Cochran's Q test p-value |
|-----------------|--------------|--------------|---------|---------|------------------------|---------------------------|-----------------------|--------------------------|------------------------------------|--------------------------|
| rs3789068 (G/A) | BCL2L11      | 2-111909247  | B-NHL   | 7       | <b>2.21E-11</b>        | 1.21 [1.15; 1.28]         | 2.21E-11              | 1.21 [1.15; 1.28]        | 0% [0; 62.9]                       | 0.5808                   |
|                 |              |              | DLBCL   | 7       | 1.20E-02               | 1.15 [1.03; 1.28]         | 7.30E-04              | 1.15 [1.06; 1.25]        | 38.7% [0; 74.2]                    | 0.1339                   |
|                 |              |              | FL      | 7       | <b>1.61E-06</b>        | 1.24 [1.14; 1.35]         | 1.61E-06              | 1.24 [1.14; 1.35]        | 0% [0; 0]                          | 0.9532                   |
|                 |              |              | CLL     | 7       | <b>6.04E-04</b>        | 1.23 [1.09; 1.38]         | 1.13E-05              | 1.25 [1.13; 1.38]        | 18% [0; 61.8]                      | 0.2927                   |
| rs3132453 (A/C) | BAG6, PRRC2A | 6-31604044   | B-NHL   | 8       | <b>1.07E-09</b>        | 0.68 [0.60; 0.77]         | 1.07E-09              | 0.68 [0.60; 0.77]        | 0% [0; 40.8]                       | 0.7984                   |
|                 |              |              | DLBCL   | 8       | <b>1.89E-04</b>        | 0.70 [0.58; 0.84]         | 1.89E-04              | 0.70 [0.58; 0.84]        | 0% [0; 40.3]                       | 0.8023                   |
|                 |              |              | FL      | 8       | <b>1.26E-06</b>        | 0.59 [0.48; 0.73]         | 1.26E-06              | 0.59 [0.48; 0.73]        | 0% [0; 43.1]                       | 0.7815                   |
|                 |              |              | CLL     | 7       | 1.32E-03               | 0.69 [0.55; 0.86]         | 1.32E-03              | 0.69 [0.55; 0.86]        | 0% [0; 22.1]                       | 0.8956                   |
| rs2239704 (A/C) | TNF, LTA     | 6-31540141   | B-NHL   | 5       | <b>3.13E-06</b>        | 0.85 [0.79; 0.91]         | 3.13E-06              | 0.85 [0.79; 0.91]        | 0% [0; 0]                          | 0.9804                   |
|                 |              |              | DLBCL   | 5       | <b>8.98E-07</b>        | 0.78 [0.71; 0.86]         | 8.98E-07              | 0.78 [0.71; 0.86]        | 0% [0; 55.9]                       | 0.7563                   |
|                 |              |              | FL      | 5       | 8.00E-02               | 0.91 [0.82; 1.01]         | 8.00E-02              | 0.91 [0.82; 1.01]        | 0% [0; 0]                          | 0.9581                   |
|                 |              |              | CLL     | 5       | 4.51E-01               | 0.93 [0.76; 1.13]         | 8.47E-02              | 0.88 [0.77; 1.02]        | 31.6% [0; 73.8]                    | 0.2111                   |
| rs909253 (G/A)  | TNF, LTA     | 6-31540313   | B-NHL   | 7       | 3.18E-02               | 1.07 [1.0; 1.14]          | 1.72E-02              | 1.07 [1.01; 1.13]        | 17% [0; 60.9]                      | 0.2999                   |
|                 |              |              | DLBCL   | 7       | <b>6.95E-04</b>        | 1.19 [1.08; 1.31]         | 2.20E-05              | 1.19 [1.10; 1.29]        | 30.4% [0; 70.3]                    | 0.1957                   |
|                 |              |              | FL      | 7       | 8.49E-01               | 0.99 [0.91; 1.08]         | 8.49E-01              | 0.99 [0.91; 1.08]        | 0% [0; 26.9]                       | 0.8797                   |
|                 |              |              | CLL     | 7       | 9.88E-01               | 1.00 [0.88; 1.13]         | 8.04E-01              | 1.01 [0.91; 1.12]        | 21.6% [0; 64.8]                    | 0.2643                   |
| rs2844482 (A/G) | TNF, LTA     | 6-31539767   | B-NHL   | 7       | <b>1.07E-03</b>        | 1.13 [1.05; 1.22]         | 9.32E-04              | 1.13 [1.05; 1.22]        | 1.9% [0; 71.4]                     | 0.4101                   |
|                 |              |              | DLBCL   | 7       | <b>7.55E-04</b>        | 1.20 [1.08; 1.33]         | 7.55E-04              | 1.20 [1.08; 1.34]        | 0% [0; 58.1]                       | 0.6518                   |
|                 |              |              | FL      | 7       | 7.77E-02               | 1.11 [0.99; 1.25]         | 7.77E-02              | 1.11 [0.99; 1.25]        | 0% [0; 67.6]                       | 0.4922                   |
|                 |              |              | CLL     | 7       | 2.29E-01               | 1.08 [0.95; 1.23]         | 2.29E-01              | 1.08 [0.95; 1.23]        | 0% [0; 22.1]                       | 0.8956                   |
| rs4833103 (C/A) | TLR1         | 4-38815502   | B-NHL   | 7       | <b>9.35E-04</b>        | 1.10 [1.04; 1.16]         | 9.35E-04              | 1.10 [1.04; 1.16]        | 0% [0; 54.9]                       | 0.6925                   |
|                 |              |              | DLBCL   | 7       | 1.28E-01               | 1.10 [0.97; 1.24]         | 4.80E-02              | 1.09 [1.00; 1.18]        | 50.9% [0; 79.2]                    | 0.057                    |
|                 |              |              | FL      | 7       | <b>3.33E-03</b>        | 1.14 [1.04; 1.24]         | 3.33E-03              | 1.14 [1.04; 1.24]        | 0% [0; 38.3]                       | 0.8286                   |
|                 |              |              | CLL     | 7       | 5.58E-01               | 1.04 [0.92; 1.17]         | 4.55E-01              | 1.04 [0.94; 1.15]        | 23.6% [0; 66.2]                    | 0.2492                   |

|                     |       |             |       |   |                 |                   |          |                   |                    |        |
|---------------------|-------|-------------|-------|---|-----------------|-------------------|----------|-------------------|--------------------|--------|
| rs3769821<br>(G/A)  | CASP8 | 2-202123430 | B-NHL | 6 | <b>9.50E-04</b> | 1.11 [1.04; 1.19] | 9.50E-04 | 1.11 [1.05; 1.19] | 0% [0; 71.8]       | 0.4805 |
|                     |       |             | DLBCL | 6 | 1.09E-01        | 1.08 [0.98; 1.19] | 1.09E-01 | 1.08 [0.98; 1.19] | 0% [0; 60.2]       | 0.671  |
|                     |       |             | FL    | 6 | 3.25E-01        | 1.07 [0.94; 1.21] | 2.42E-01 | 1.06 [0.96; 1.17] | 35.9% [0; 74.4]    | 0.1678 |
|                     |       |             | CLL   | 6 | 3.88E-02        | 1.21 [1.01; 1.46] | 2.99E-03 | 1.19 [1.06; 1.33] | 47.4% [0; 79.1]    | 0.0907 |
| rs1799930<br>(A/G)  | NAT2  | 8-18258103  | B-NHL | 7 | 4.72E-03        | 0.91 [0.86; 0.97] | 4.72E-03 | 0.91 [0.86; 0.97] | 0% [0; 70]         | 0.4404 |
|                     |       |             | DLBCL | 7 | 5.76E-01        | 0.97 [0.89; 1.07] | 5.76E-01 | 0.97 [0.89; 1.07] | 0% [0; 55.4]       | 0.6867 |
|                     |       |             | FL    | 7 | <b>9.77E-04</b> | 0.85 [0.77; 0.93] | 9.77E-04 | 0.85 [0.77; 0.93] | 0% [0; 52.4]       | 0.7201 |
|                     |       |             | CLL   | 6 | 3.50E-01        | 0.91 [0.74; 1.11] | 3.58E-02 | 0.88 [0.78; 0.99] | 51% [0; 80.5]      | 0.0695 |
| rs10008492<br>(A/G) | -     | 4-38765720  | B-NHL | 6 | <b>1.29E-03</b> | 1.15 [1.06; 1.25] | 1.48E-04 | 1.14 [1.06; 1.21] | 36.2% [0; 74.6]    | 0.1651 |
|                     |       |             | DLBCL | 6 | 1.24E-01        | 1.10 [0.97; 1.24] | 5.17E-02 | 1.10 [1.00; 1.22] | 33.9% [0; 73.5]    | 0.1819 |
|                     |       |             | FL    | 6 | 5.53E-02        | 1.19 [1.00; 1.41] | 2.27E-03 | 1.1 [1.06; 1.25]  | 68.4% [25.5; 86.6] | 0.0073 |
|                     |       |             | CLL   | 6 | 4.83E-02        | 1.14 [1.00; 1.30] | 4.14E-02 | 1.13 [1.00; 1.28] | 7% [0; 76.4]       | 0.3719 |

**Supplementary Table 4.** Summary of Adjusted Odds Ratios from Meta-analysis for Risk of B-cell Non-Hodgkin Lymphoma, Follicular Lymphoma, Diffuse Large B-Cell Lymphoma, Chronic Lymphocytic Leukemia, Mantle Cell Lymphoma and Marginal Zone Lymphoma associated with rs3789068 (A>G) (*BCL2L11*).

|                      |                                          | <b>BNHL</b>       | <b>FL</b>         | <b>DLBCL</b>      | <b>CLL</b>        | <b>MCL</b>        | <b>MZL</b>         |
|----------------------|------------------------------------------|-------------------|-------------------|-------------------|-------------------|-------------------|--------------------|
| <b>Meta-analysis</b> | <b>#Studies</b>                          | 7                 | 7                 | 7                 | 7                 | 6                 | 7                  |
|                      | <b>MAF ca/co</b>                         | 0.51/0.46         | 0.52/0.46         | 0.50/0.46         | 0.52/0.46         | 0.50/0.47         | 0.50/0.46          |
|                      | <b>Random-effects p-value</b>            | 2.21E-11          | 1.61E-06          | 1.20E-02          | 6.04E-04          | 2.91E-01          | 3.46E-02           |
|                      | <b>Random-effects OR (95%CI)</b>         | 1.21 [1.15; 1.28] | 1.24 [1.14; 1.35] | 1.15 [1.03; 1.28] | 1.23 [1.09; 1.38] | 1.12 [0.91; 1.37] | 1.18 [1.01; 1.37]  |
|                      | <b>I<sup>2</sup> heterogeneity index</b> | 0% [0; 62.9]      | 0% [0; 0]         | 38.7% [0; 74.2]   | 18% [0; 61.8]     | 0% [0; 53.6]      | 0% [0; 39.7]       |
|                      | <b>Cochran's Q test p-value</b>          | 0.5808            | 0.9532            | 0.1339            | 0.2927            | 0.7412            | 0.8205             |
|                      | <b>Random-effects p-value (95%CI)*</b>   | 9.28E-06          | 1.51E-02          | 2.32E-02          | 6.26E-04          | 2.27E-01          | 3.74E-01           |
|                      | <b>Random-effects OR (95%CI)*</b>        | 1.21 [1.11; 1.32] | 1.18 [1.03; 1.35] | 1.19 [1.02; 1.38] | 1.28 [1.11; 1.47] | 1.21 [0.89; 1.65] | 1.181 [0.88; 1.39] |
| <b>Epilymph</b>      | <b>p-value</b>                           | 3.25E-05          | 0.1172            | 0.0006399         | 0.00202           | 0.09266           | 0.5733             |
|                      | <b>OR (95%CI)</b>                        | 1.28 (1.14-1.44)  | 1.19 (0.96-1.48)  | 1.34 (1.13-1.58)  | 1.34 (1.11-1.61)  | 1.43 (0.94-2.17)  | 1.08 (0.82-1.44)   |
|                      | <b>MAF ca/co</b>                         | 0.51/0.45         | 0.50/0.45         | 0.52/0.45         | 0.52/0.45         | 0.54/0.45         | 0.47/0.45          |
| <b>BC</b>            | <b>p-value</b>                           | 0.295             | 0.4342            | 0.6728            | 0.7868            | 0.9505            | 0.6028             |
|                      | <b>OR (95%CI)</b>                        | 1.10 (0.92-1.31)  | 1.10 (0.86-1.41)  | 1.06 (0.82-1.37)  | 1.07 (0.65-1.76)  | 0.99 (0.62-1.57)  | 1.11 (0.75-1.64)   |
|                      | <b>MAF ca/co</b>                         | 0.48/0.46         | 0.49/0.46         | 0.48/0.46         | 0.49/0.46         | 0.46/0.46         | 0.48/0.46          |
| <b>Mayo</b>          | <b>p-value</b>                           | 4.49E-05          | 0.01275           | 0.4008            | 0.0005466         | 0.7692            | 0.08217            |
|                      | <b>OR (95%CI)</b>                        | 1.29 (1.14-1.45)  | 1.28 (1.05-1.56)  | 1.10 (0.83-1.38)  | 1.35 (1.14-1.61)  | 0.94 (0.64-1.40)  | 1.39 (0.96-2.00)   |
|                      | <b>MAF ca/co</b>                         | 0.54/0.47         | 0.53/0.47         | 0.50/0.47         | 0.55/0.47         | 0.47/0.47         | 0.55/0.47          |
| <b>UCSF1</b>         | <b>p-value</b>                           | -                 | -                 | -                 | -                 | -                 | -                  |
|                      | <b>OR (95%CI)</b>                        | -                 | -                 | -                 | -                 | -                 | -                  |
|                      | <b>MAF ca/co</b>                         | -                 | -                 | -                 | -                 | -                 | -                  |
| <b>UCSF2</b>         | <b>p-value</b>                           | 0.02755           | 0.06857           | 0.3552            | 0.08926           | 0.9747            | 0.2957             |
|                      | <b>OR (95%CI)</b>                        | 1.19 (1.02-1.40)  | 1.24 (0.989-1.56) | 1.11 (0.89-1.38)  | 1.23 (0.97-1.57)  | 1.05 (0.05-20.05) | 2.54 (0.44-14.52)  |
|                      | <b>MAF ca/co</b>                         | 0.49/0.45         | 0.49/0.45         | 0.48/0.45         | 0.50/0.45         | 0.5/0.45          | 0.67/0.45          |
| <b>NSW</b>           | <b>p-value</b>                           | 0.1956            | 0.0246            | 0.4973            | 0.2456            | 0.9936            | 0.9703             |
|                      | <b>OR (95%CI)</b>                        | 1.13 (0.94-1.35)  | 1.32 (1.04-1.69)  | 1.09 (0.85-1.40)  | 0.66 (0.32-1.34)  | 1.00 (0.52-1.92)  | 0.99 (0.65-1.52)   |
|                      | <b>MAF ca/co</b>                         | 0.52/0.49         | 0.56/0.49         | 0.51/0.49         | 0.38/0.49         | 0.5/0.49          | 0.48/0.49          |
| <b>NCI-SEER</b>      | <b>p-value</b>                           | 0.11              | 0.01962           | 0.7121            | 0.4536            | 0.3373            | 0.2337             |
|                      | <b>OR (95%CI)</b>                        | 1.13 (0.97-1.32)  | 1.30 (1.04-1.62)  | 0.96 (0.78-1.18)  | 1.13 (0.82-1.56)  | 1.27 (0.78-2.09)  | 1.25 (0.87-1.81)   |
|                      | <b>MAF ca/co</b>                         | 0.52/0.48         | 0.55/0.48         | 0.44/0.48         | 0.52/0.48         | 0.55/0.48         | 0.54/0.48          |

|             |                   |                  |                  |                  |                  |   |                  |
|-------------|-------------------|------------------|------------------|------------------|------------------|---|------------------|
| <b>Yale</b> | <b>p-value</b>    | 0.02013          | 0.2149           | 0.007205         | 0.6213           | - | 0.2625           |
|             | <b>OR (95%CI)</b> | 1.28 (1.04-1.58) | 1.21 (0.89-1.65) | 1.47 (1.11-1.95) | 0.89 (0.56-1.41) | - | 1.35 (0.80-2.30) |
|             | <b>MAF ca/co</b>  | 0.50/0.44        | 0.49/0.44        | 0.53/0.44        | 0.41/0.44        | - | 0.52/0.44        |

\*Meta-analysis results after excluding the studies that provided first evidence of the association of rs3789068 with lymphoma risk (NCI-SEER, NSW, Yale and Mayo) (<sup>17, 18</sup>).



**Supplementary Table 5.** Summary of Adjusted Odds Ratios from Meta-analysis for Risk of B-cell Non-Hodgkin Lymphoma, Follicular Lymphoma, Diffuse Large B-Cell Lymphoma, Chronic Lymphocytic Leukemia, Mantle Cell Lymphoma, and Marginal Zone Lymphoma associated with rs3132453 A>C (*PRRC2A*).

|                      |                                          | <b>BNHL</b>       | <b>FL</b>         | <b>DLBCL</b>      | <b>CLL</b>        | <b>MCL</b>        | <b>MZL</b>        |
|----------------------|------------------------------------------|-------------------|-------------------|-------------------|-------------------|-------------------|-------------------|
| <b>Meta-analysis</b> | <b>#Studies</b>                          | 8                 | 8                 | 8                 | 7                 | 6                 | 7                 |
|                      | <b>MAF ca/co</b>                         | 0.047/0.066       | 0.041/0.066       | 0.045/0.066       | 0.048/0.068       | 0.069/0.070       | 0.061/0.068       |
|                      | <b>Random-effects p-value</b>            | 1.07E-09          | 1.26E-06          | 1.89E-04          | 1.32E-03          | 7.92E-01          | 6.93E-01          |
|                      | <b>Random-effects OR (95%CI)</b>         | 0.68 [0.60; 0.77] | 0.59 [0.48; 0.73] | 0.70 [0.58; 0.84] | 0.69 [0.55; 0.86] | 1.06 [0.69; 1.61] | 0.93 [0.66; 1.32] |
|                      | <b>I<sup>2</sup> heterogeneity index</b> | 0% [0; 40.8]      | 0% [0; 43.1]      | 0% [0; 40.3]      | 0% [0; 22.1]      | 0% [0; 67.7]      | 9% [0; 73.4]      |
|                      | <b>Cochran's Q test p-value</b>          | 0.7984            | 0.7815            | 0.8023            | 0.8956            | 0.5592            | 0.3599            |
|                      | <b>Random-effects p-value (95%CI)*</b>   | 1.41E-08          | 1.89E-05          | 1.11E-03          | 1.58E-02          | 3.29E-01          | 7.97E-01          |
|                      | <b>Random-effects OR (95%CI)*</b>        | 0.66 [0.57; 0.76] | 0.59 [0.46; 0.75] | 0.71 [0.58; 0.87] | 0.69 [0.51; 0.93] | 0.75 [0.41; 1.34] | 0.94 [0.60; 1.48] |
| <b>Epilymph</b>      | <b>p-value</b>                           | 0.006331          | 0.0818            | 0.1139            | 0.2314            | 0.273             | 0.07432           |
|                      | <b>OR (95%CI)</b>                        | 0.67 (0.52-0.90)  | 0.60 (0.34-1.07)  | 0.72 (0.48-1.08)  | 0.77 (0.50-1.18)  | 0.52 (0.16-1.67)  | 0.47 (0.20-1.08)  |
|                      | <b>MAF ca/co</b>                         | 0.040/0.058       | 0.035/0.058       | 0.042/0.058       | 0.045/0.058       | 0.031/0.058       | 0.028/0.058       |
| <b>BC</b>            | <b>p-value</b>                           | 0.03172           | 0.3497            | 0.01884           | 0.09323           | 0.3484            | 0.7646            |
|                      | <b>OR (95%CI)</b>                        | 0.67 (0.47-0.97)  | 0.79 (0.478-1.30) | 0.46 (0.24-0.88)  | 0.18 (0.025-1.33) | 0.62 (0.22-1.70)  | 1.11 (0.55-2.26)  |
|                      | <b>MAF ca/co</b>                         | 0.060/0.089       | 0.071/0.089       | 0.041/0.089       | 0.089/0.081       | 0.054/0.089       | 0.098/0.089       |
| <b>Mayo</b>          | <b>p-value</b>                           | 0.0153            | 0.02238           | 0.06211           | 0.03401           | 0.1694            | 0.7529            |
|                      | <b>OR (95%CI)</b>                        | 0.75 (0.59-0.95)  | 0.61 (0.40-0.93)  | 0.63 (0.39-1.02)  | 0.68 (0.48-0.97)  | 1.52 (0.84-2.78)  | 0.90 (0.45-1.78)  |
|                      | <b>MAF ca/co</b>                         | 0.063/0.082       | 0.051/0.082       | 0.053/0.082       | 0.058/0.082       | 0.120/0.082       | 0.075/0.082       |
| <b>UCSF1</b>         | <b>p-value</b>                           | 0.006328          | 0.04253           | 0.3327            | -                 | -                 | -                 |
|                      | <b>OR (95%CI)</b>                        | 0.40 (0.20-0.77)  | 0.29 (0.09-0.96)  | 0.65 (0.27-1.56)  | -                 | -                 | -                 |
|                      | <b>MAF ca/co</b>                         | 0.020/0.044       | 0.014/0.044       | 0.031/0.044       | -                 | -                 | -                 |
| <b>UCSF2</b>         | <b>p-value</b>                           | 0.02252           | 0.0131            | 0.3952            | 0.1678            | 0.9948            | 0.2728            |
|                      | <b>OR (95%CI)</b>                        | 0.64 (0.44-0.94)  | 0.41 (0.20-0.83)  | 0.80 (0.49-1.33)  | 0.64 (0.34-1.20)  | 1.102e-06 (0-inf) | 3.47 (0.38-32.10) |
|                      | <b>MAF ca/co</b>                         | 0.041/0.058       | 0.032/0.058       | 0.045/0.058       | 0.044/0.058       | 0/0.058           | 0.167/0.058       |
| <b>NSW</b>           | <b>p-value</b>                           | 0.4167            | 0.3514            | 0.8833            | 0.9965            | 0.9964            | 0.3419            |
|                      | <b>OR (95%CI)</b>                        | 0.81 (0.49-1.35)  | 0.71 (0.34-1.47)  | 0.95 (0.46-1.96)  | 1.932e-08 (0-inf) | 2.378e-08 (0-inf) | 1.59 (0.61-4.13)  |
|                      | <b>MAF ca/co</b>                         | 0.043/0.053       | 0.038/0.053       | 0.05/0.053        | 0/0.053           | 0/0.053           | 0.083/0.053       |
| <b>NCI-SEER</b>      | <b>p-value</b>                           | 0.006278          | 0.0217            | 0.03432           | 0.3231            | 0.8504            | 0.9861            |
|                      | <b>OR (95%CI)</b>                        | 0.65 (0.48-0.88)  | 0.55 (0.33-0.92)  | 0.61 (0.39-0.96)  | 0.71 (0.36-1.40)  | 1.09 (0.43-2.75)  | 0.99 (0.51-1.92)  |
|                      | <b>MAF ca/co</b>                         | 0.050/0.078       | 0.043/0.078       | 0.046/0.078       | 0.056/0.078       | 0.086/0.078       | 0.078/0.078       |

|             |                   |                  |                  |                  |                  |   |                  |
|-------------|-------------------|------------------|------------------|------------------|------------------|---|------------------|
| <b>Yale</b> | <b>p-value</b>    | 0.1295           | 0.1631           | 0.7774           | 0.3315           | - | 0.2561           |
|             | <b>OR (95%CI)</b> | 0.67 (0.41-1.12) | 0.54 (0.23-1.28) | 0.91 (0.49-1.70) | 0.49 (0.12-2.05) | - | 0.32 (0.04-2.31) |
|             | <b>MAF ca/co</b>  | 0.038/0.055      | 0.031/0.055      | 0.051/0.055      | 0.028/0.055      | - | 0.018/0.055      |

\*Meta-analysis results after excluding the study that provided first evidence of the association of rs3132453 with lymphoma risk (Mayo) (<sup>11</sup>).

**Supplementary Figure 1.** Heterogeneity among most common B-cell NHL subtypes for rs3789068 (*BCL2L11*) rs3132453 (*PRRC2A*) and the TNF/LTA SNPs rs2239704, rs909253 and rs284482

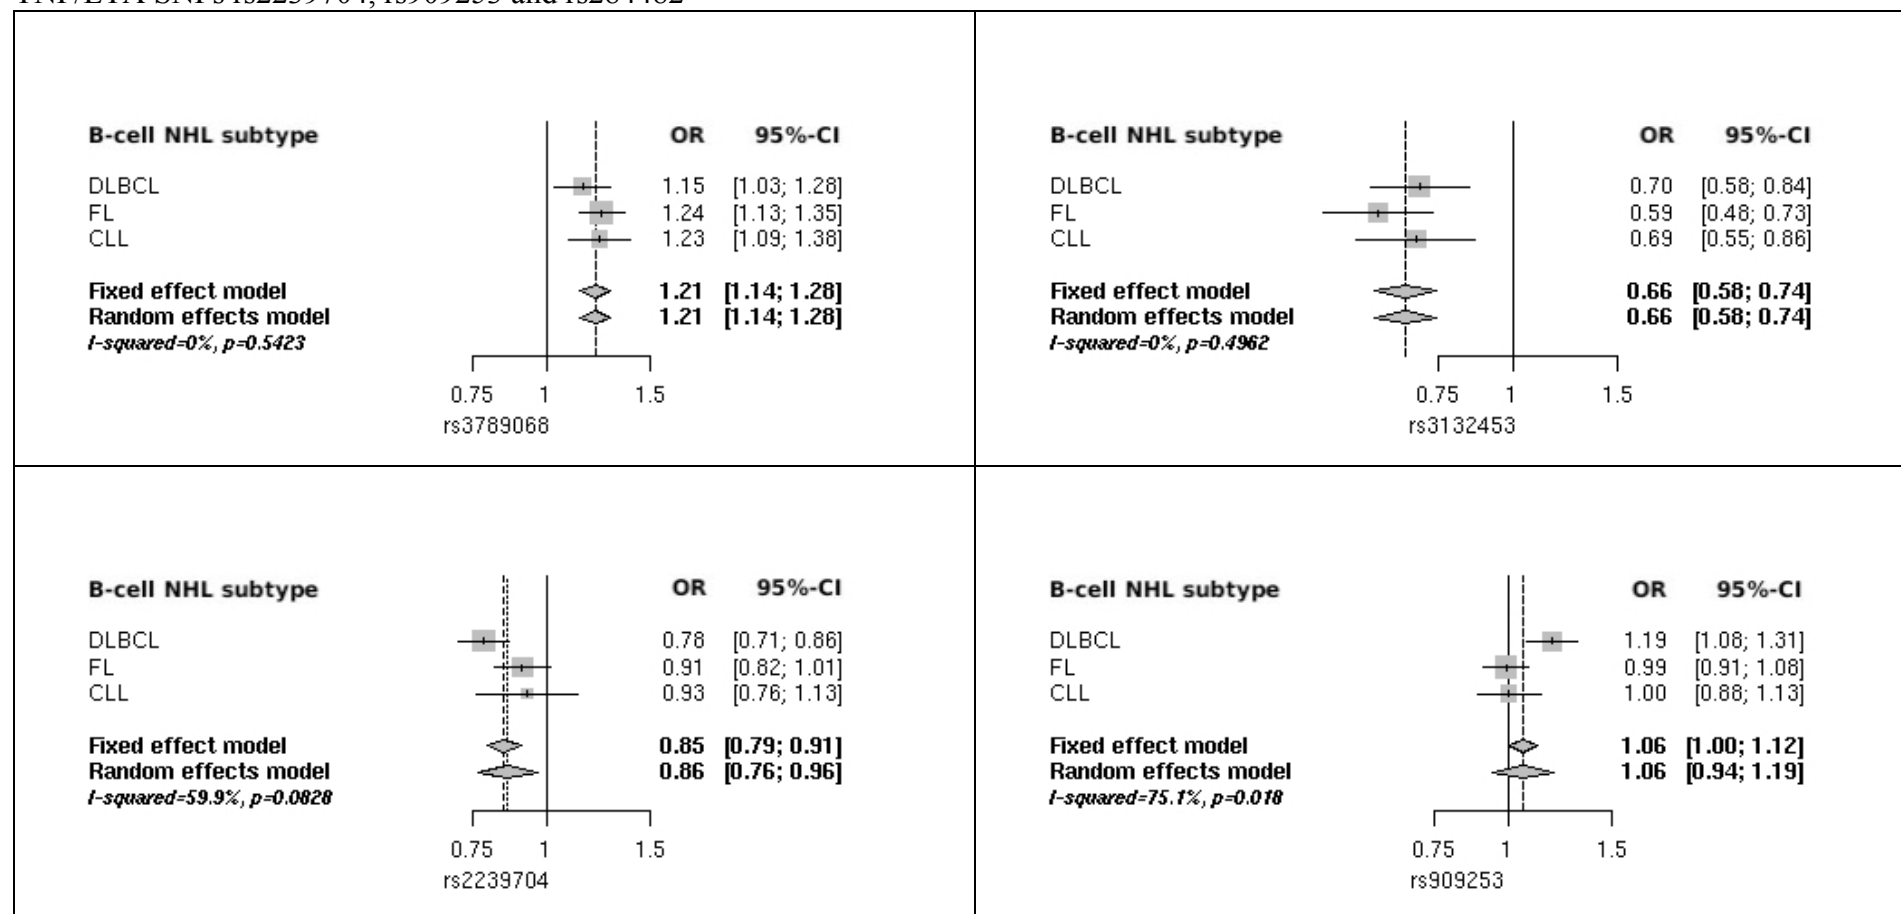

**B-cell NHL subtype**

DLBCL  
FL  
CLL

**Fixed effect model**  
**Random effects model**  
*I-squared=0%, p=0.4295*

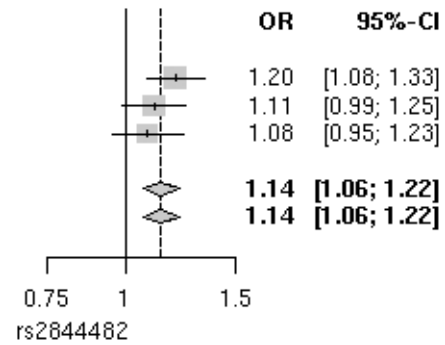

Supplement: supp_blood-2012-05-427989_blood-2012-05-427989-1.pdf [file supp_blood-2012-05-427989_blood-2012-05-427989-1.pdf]
